# Supplementary material for: The Modulation of NADPH Oxidase Activity in Human Neutrophils by Moroccan Strains of Leishmania major and Leishmania tropica Is Not Associated with p47phox Phosphorylation
Source: MDPI journal article supplement (doi:10.3390/microorganisms9051025), 2021-05-10

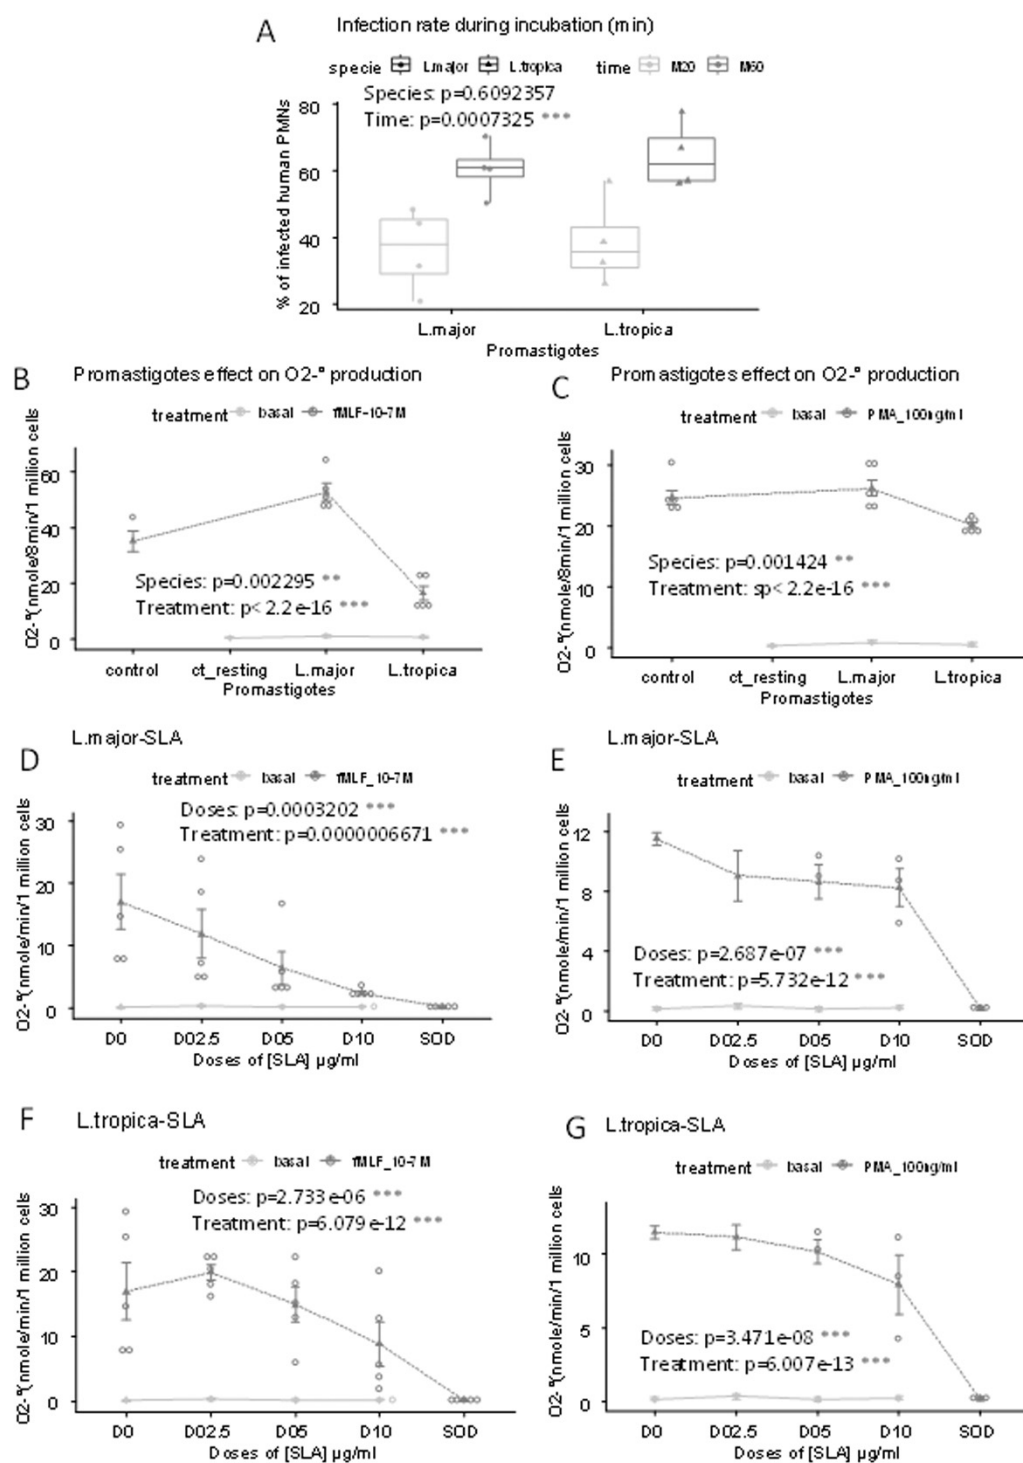

**Supplemental Figure 1: Factorial analyses for ROS production:** for A to G: p-values on respective factors were obtained by two-way factorial ANOVA; A/Boxplot of PMNs infection rate during incubation in minutes; B/ Dot and Whisker plot of promastigote effect on  $O_2^{\cdot-}$  radical production in presence of fMLF treatment; C/ Dot and Whisker plot of promastigote effect on  $O_2^{\cdot-}$  radical production in presence of PMA treatment; D/ Dot and Whisker plot of L.major-SLA effect on  $O_2^{\cdot-}$  radical production in presence of fMLF treatment; E/ Dot and Whisker plot of L.major-SLA effect on  $O_2^{\cdot-}$  radical production in presence of PMA treatment; F/ Dot and Whisker plot of L.tropica-SLA effect on  $O_2^{\cdot-}$  radical production in presence of fMLF treatment; G/ Dot and Whisker plot of L.tropica-SLA effect on  $O_2^{\cdot-}$  radical production in presence of PMA treatment

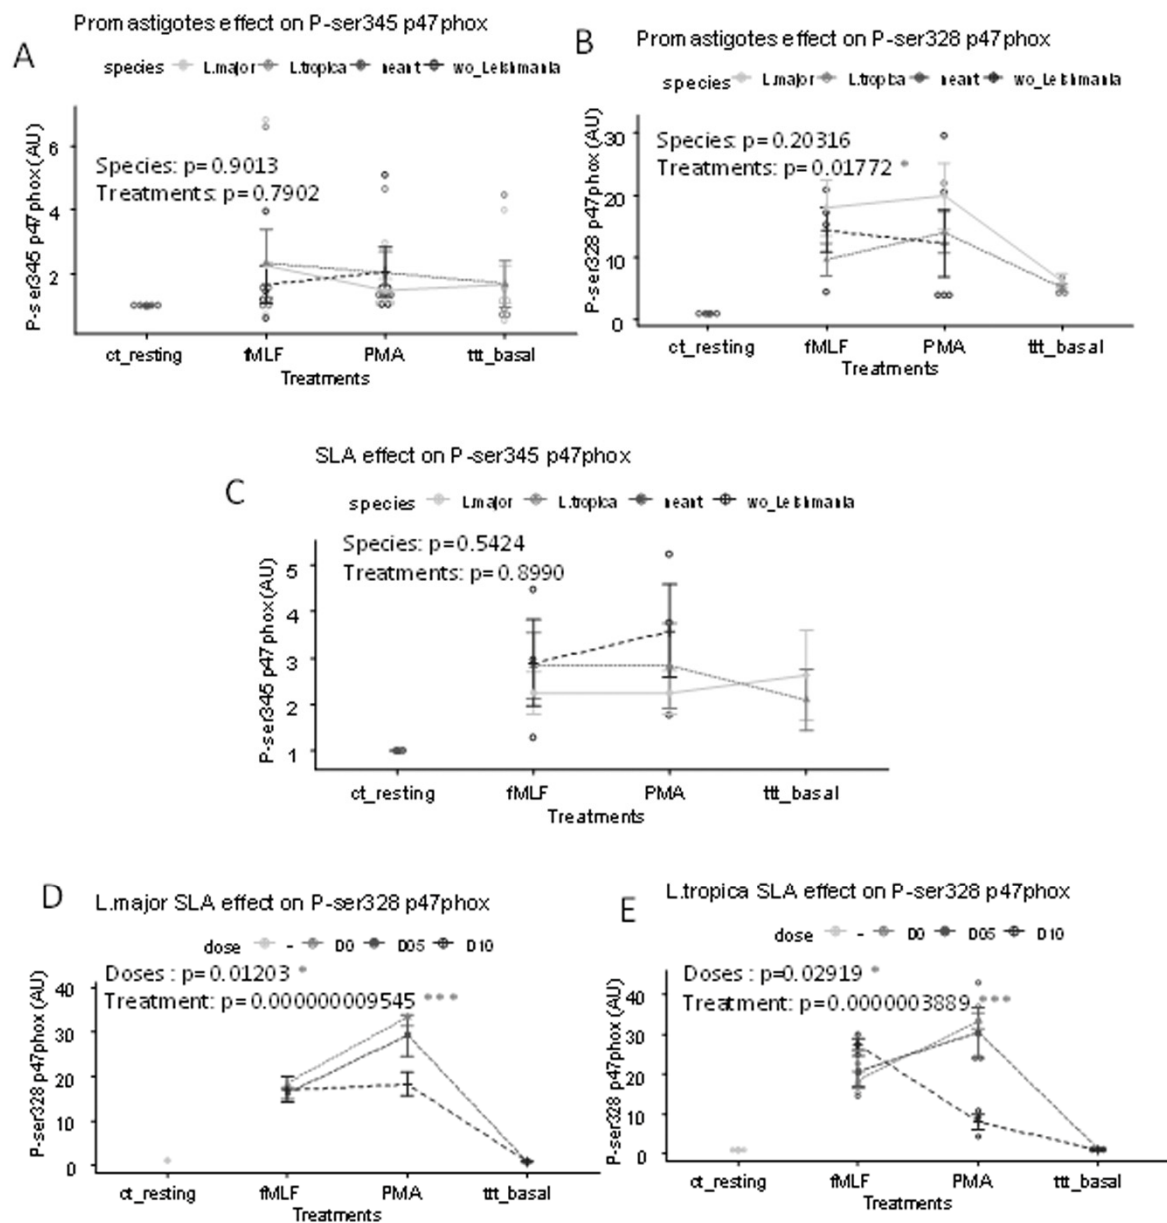

**Supplemental Figure 2: Factorial analyses for mechanisms on P47-Phox NADPH oxidase:** for A to E: p-values on respective factors were obtained by two-way factorial ANOVA; A/Promastigote effect on Ser345 phosphorylation of p47-phox; B/Promastigote effect on Ser328 phosphorylation of p47-phox; C/ SLA effect on Ser345 phosphorylation of p47-phox; D/*L.major* SLA effect on Ser328 phosphorylation of p47-phox; E/ *L.tropica* SLA effect on Ser328 phosphorylation of p47-phox.

# Supplementary result (Figure 3'A,B,C,D)

(MAKSOURI *et al.*)

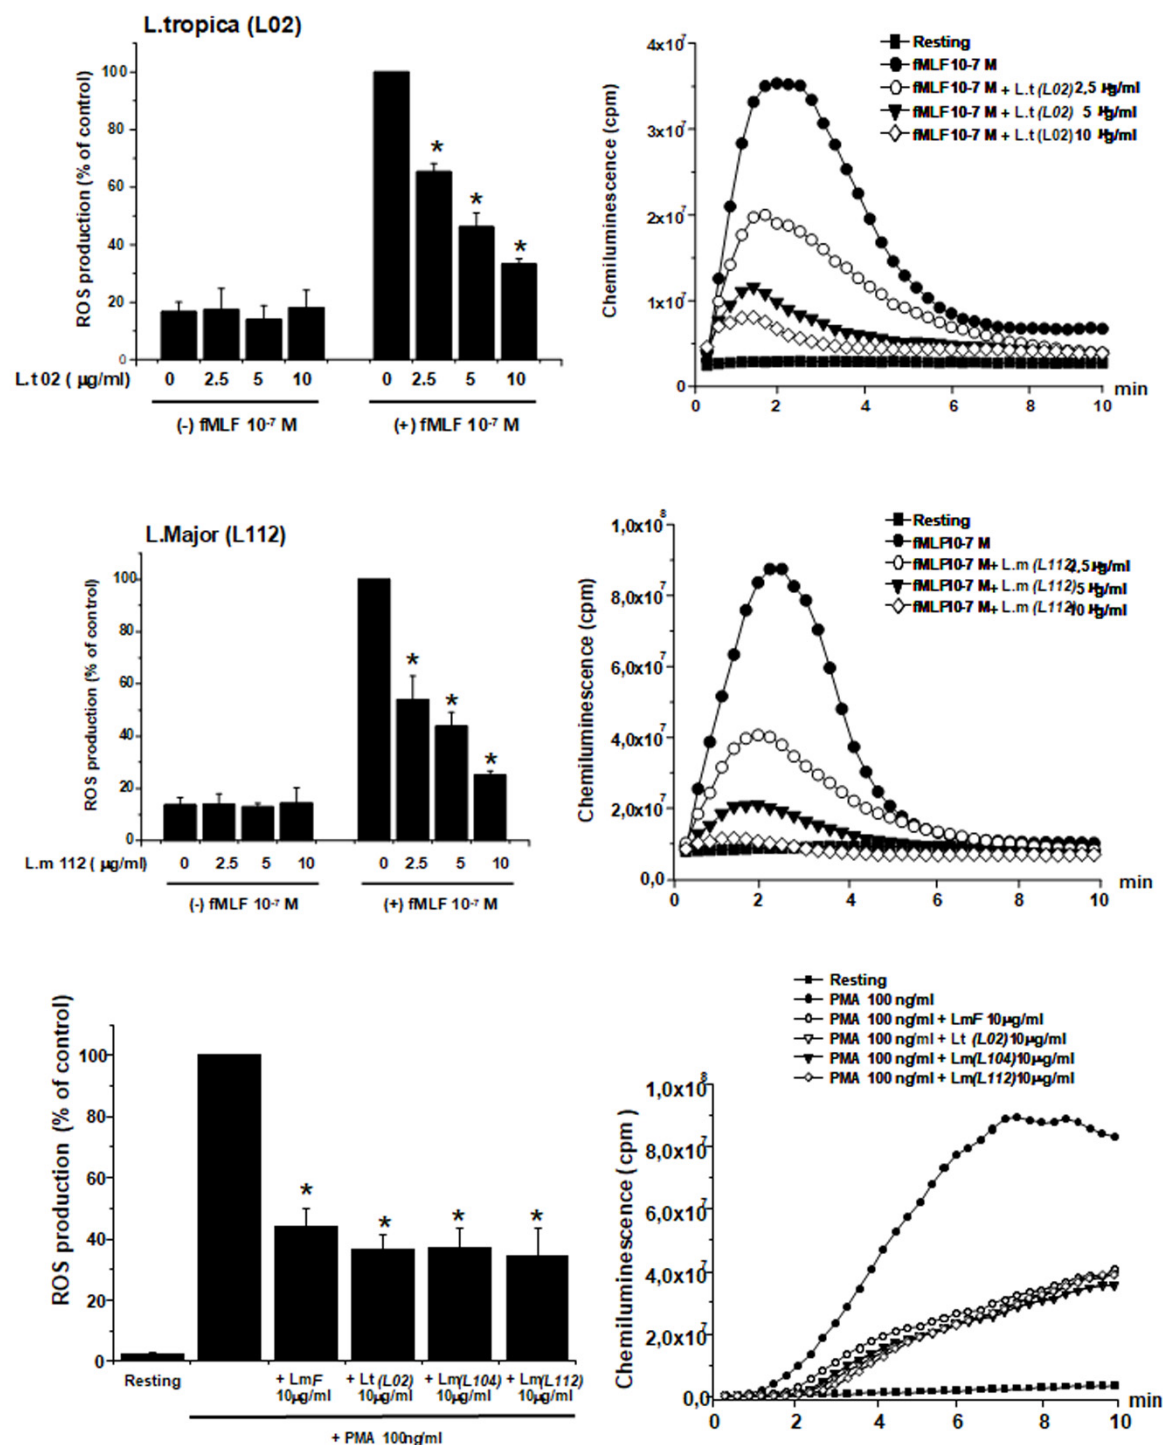

Supplement: s1 [file s1]
